# Supplementary material for: Targeting the Ezrin Adaptor Protein Sensitizes Metastatic Breast Cancer Cells to Chemotherapy and Reduces Neoadjuvant Therapy–induced Metastasis
Source: PubMed Central journal article supplement (PMC10010290; doi:10.1158/2767-9764.crc-21-0117), 2022-06-17
Supplement: crc-21-0117-s01.pdf [file crc-21-0117-s01.pdf]

## *Supplementary Table 1*

| <b>Cell lines</b> | <b><i>TP53</i></b> | <b><i>PTEN</i></b>        | <b><i>PIK3CA</i></b> | <b>Other</b>                   |
|-------------------|--------------------|---------------------------|----------------------|--------------------------------|
| MCF10A            | -                  | -                         | -                    | -                              |
| MCF-7             | -                  | -                         | E545K                | PIK3AP1                        |
| T-47D             | L194F              | -                         | H1047R               |                                |
| BT-474            | E285K              | -                         | K11N                 | HER2amp                        |
| ZR-75-1           | -                  | L108R                     | -                    | HRAS                           |
| MDA-MB-231        | R280K              | -                         | -                    | BRAF<br>KRAS<br>MYCL<br>PIK3R6 |
| MDA-MB-468        | R273H              | Silent mut<br>c.253+1 G>T | -                    |                                |
| SK-BR-3           | R175H              | -                         | -                    | HER2amp                        |

### **Supplementary Table 1: Common gene mutations or amplifications found in the BC cell line panel**

A list of mutations/gene amplifications for the breast cell lines used in this study was compiled using the Broad Institute Cancer Dependency Map (depmap) online portal and SIB Swiss Institute of Bioinformatics Cellosaurus online database as described in the Data Availability section of Materials and Methods. The amino acid substitutions are shown for TP53, PTEN and PIK3CA. A PTEN silent mutation is found in MDA-MB-468 cells and the nucleic acid substitution is indicated instead. Other commonly mutated genes or gene amplifications (amp) are listed in the “other” column. Dashes indicate wildtype status of the gene or no known mutation.
