# Supplementary material for: Targeting the Ezrin Adaptor Protein Sensitizes Metastatic Breast Cancer Cells to Chemotherapy and Reduces Neoadjuvant Therapy–induced Metastasis
Source: PubMed Central journal article supplement (PMC10010290; doi:10.1158/2767-9764.crc-21-0117), 2022-06-17
Supplement: crc-21-0117-s02.pdf [file crc-21-0117-s02.pdf]

## Supplementary Table 2

| Cell line  | NSC IC <sub>50</sub> ± SD (μM) |
|------------|--------------------------------|
| MCF10A     | 44.95 ± 6.25                   |
| MCF-7      | 20.67 ± 6.34                   |
| T-47D      | 45.48 ± 1.17                   |
| BT-474     | 37.24 ± 1.36                   |
| ZR-75-1    | 9.43 ± 2.64                    |
| MDA-MB-231 | 29.32 ± 5.27                   |
| MDA-MB-468 | 22.67 ± 6.53                   |
| SK-BR-3    | 16.35 ± 1.32                   |

### Supplementary Table 2: Summary of IC<sub>50</sub> values

A list of IC<sub>50</sub> values ± standard deviations (SD) for NSC treatment for the panel of cell lines is shown. The indicated cell lines were treated to varying concentrations of NSC for 72 hours and were subjected to cell viability analysis. IC<sub>50</sub> values were generated from non-linear regression (curve-fit) analysis using GraphPad Prism software. Mean values and SDs were calculated based on a 3 independent cell viability experiments.
