# Supplementary material for: Targeting the Ezrin Adaptor Protein Sensitizes Metastatic Breast Cancer Cells to Chemotherapy and Reduces Neoadjuvant Therapy–induced Metastasis
Source: PubMed Central journal article supplement (PMC10010290; doi:10.1158/2767-9764.crc-21-0117), 2022-06-17
Supplement: crc-21-0117-s03.pdf [file crc-21-0117-s03.pdf]

### Supplementary Table 3

| ZR-75-1               |                            |                               | MDA-MB-231                 |                               |
|-----------------------|----------------------------|-------------------------------|----------------------------|-------------------------------|
| DOX (uM)<br>+NSC (uM) | Constant<br>ratio<br>(EOB) | Non-constant<br>ratio<br>(CI) | Constant<br>ratio<br>(EOB) | Non-constant<br>ratio<br>(CI) |
| 0.01                  | <b>0.12</b>                | 5.39                          | <b>0.03</b>                | 9.56                          |
| 0.1                   | <b>0.12</b>                | <b>0.65</b>                   | <b>0.16</b>                | 4.66                          |
| 1.0                   | <b>0.24</b>                | <b>0.65</b>                   | <b>0.41</b>                | <b>0.32</b>                   |
| 5.0                   | <b>0.45</b>                | <b>0.72</b>                   | <b>0.15</b>                | <b>0.32</b>                   |
| 10                    | <b>0.29</b>                | <b>0.25</b>                   | <b>0.10</b>                | <b>0.32</b>                   |
| 25                    | <b>0.02</b>                | <b>0.06</b>                   | <b>0.10</b>                | <b>0.43</b>                   |
| 50                    | -0.01                      | <b>0.03</b>                   | (0.002)                    | <b>0.41</b>                   |
| 100                   | -0.01                      | <b>0.02</b>                   | -0.01                      | <b>0.22</b>                   |

| ZR-75-1               |                            |                               | MDA-MB-231              |                               |
|-----------------------|----------------------------|-------------------------------|-------------------------|-------------------------------|
| DTX (nM)<br>+NSC (uM) | Constant<br>ratio<br>(EOB) | Non-constant<br>ratio<br>(CI) | Constant ratio<br>(EOB) | Non-constant<br>ratio<br>(CI) |
| 0.01                  | <b>0.09</b>                | 6.91                          | -0.08                   | 11.73                         |
| 0.1                   | <b>0.26</b>                | 2.29                          | <b>0.07</b>             | 2.47                          |
| 1.0                   | <b>0.25</b>                | 1.71                          | <b>0.12</b>             | 2.52                          |
| 5.0                   | <b>0.52</b>                | <b>0.79</b>                   | <b>0.21</b>             | 1.63                          |
| 10                    | <b>0.33</b>                | <b>0.79</b>                   | <b>0.20</b>             | <b>0.7</b>                    |
| 25                    | -0.11                      | <b>0.88</b>                   | <b>0.29</b>             | <b>0.73</b>                   |
| 50                    | -0.02                      | <b>0.32</b>                   | <b>0.03</b>             | <b>0.69</b>                   |
| 100                   | (-0.002)                   | <b>0.24</b>                   | -0.02                   | <b>0.21</b>                   |

EOB: Excess over Bliss  
CI: Combination Index

### **Supplementary Table 3. Drug synergy analysis of DOX or DTX in combination with NSC**

Drug synergy analysis was performed using two different methods: Excess-over-Bliss (EOB; [20] ) and Combination Index (CI; [19]). EOB was performed using a constant ratio of drug 1 to drug 2 across multiple concentrations of drugs tested (i.e. 1:1 with DOX:NSC and 1:1000 with DTX:NSC) while CI analysis was performed using a fixed concentration of NSC (i.e. IC<sub>15</sub> for ZR-75-1 and MDA-MB-231) with varying concentrations of DOX or DTX. Values in bold text represent concentrations of drug where synergy was observed, whereas negative/italicized values represent concentrations where antagonism was observed. Values in parentheses represent observed additivity.
