# Supplementary material for: Targeting the Ezrin Adaptor Protein Sensitizes Metastatic Breast Cancer Cells to Chemotherapy and Reduces Neoadjuvant Therapy–induced Metastasis
Source: PubMed Central journal article supplement (PMC10010290; doi:10.1158/2767-9764.crc-21-0117), 2022-06-17
Supplement: crc-21-0117-s04.pdf [file crc-21-0117-s04.pdf]

## Supplementary Figure 1

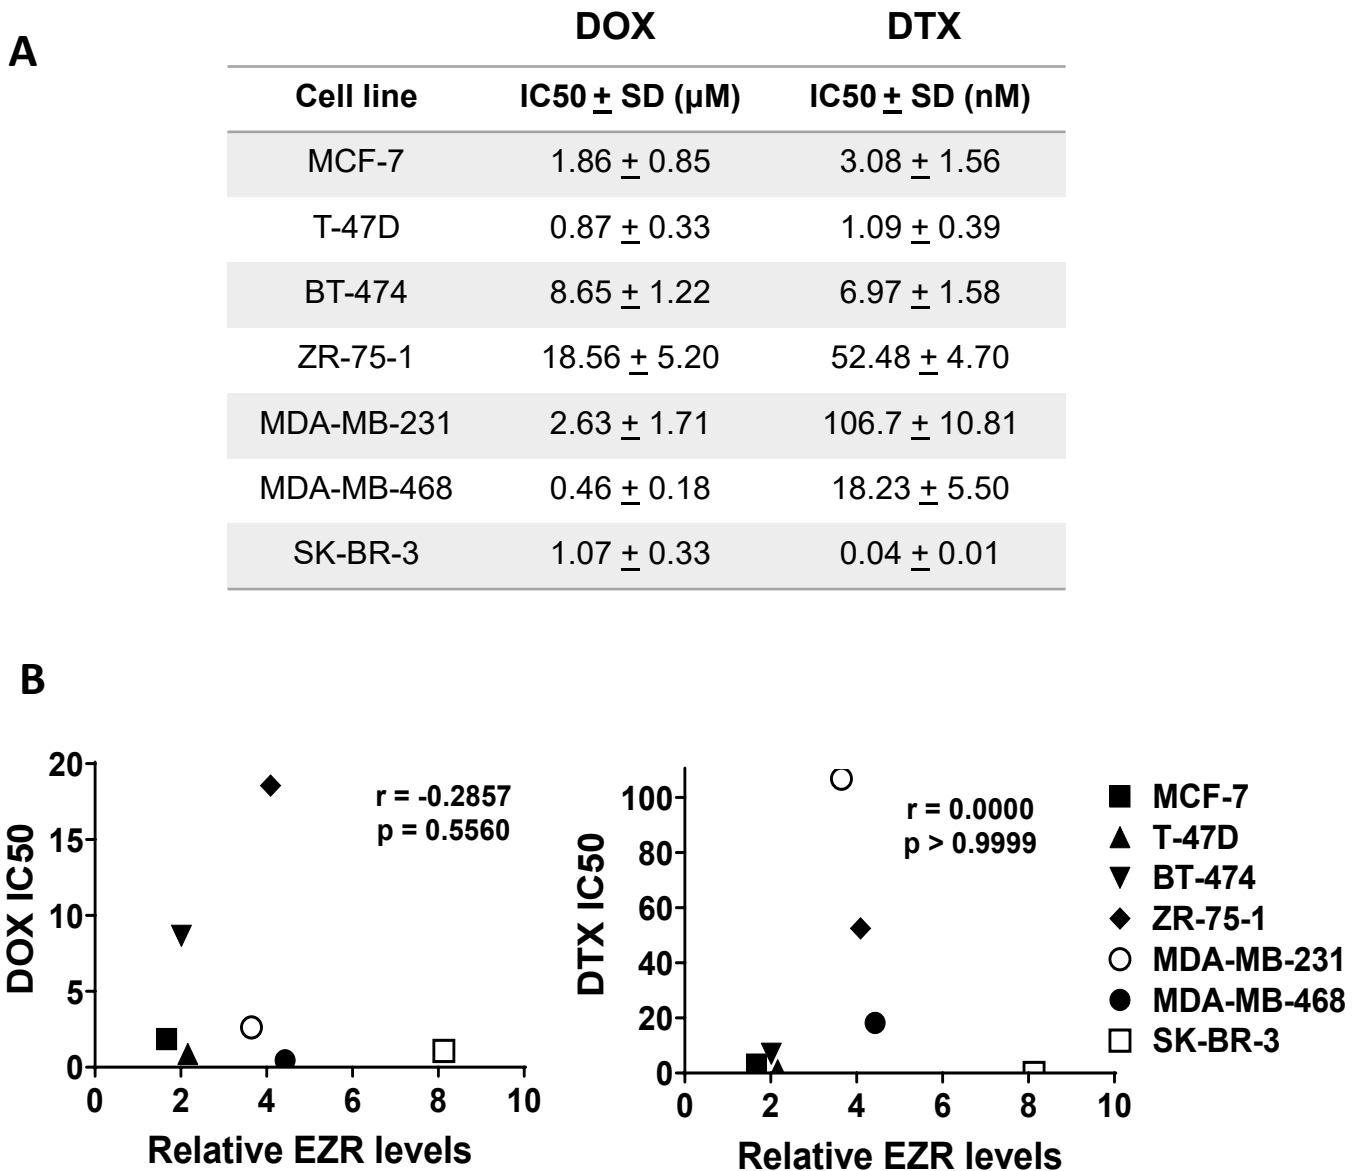

### Supplementary Figure 1. Correlation analysis of ezrin levels with DOX or DTX sensitivity

(A) A summary of IC<sub>50</sub> values ± standard deviations (SD) for DOX or DTX treatment for the BC cell lines listed. IC<sub>50</sub> values were generated from cell viability analyses as described in Materials and Methods. Data shown are representative of 3 independent experiments. (B) Spearman's correlation analysis was performed between relative ezrin (EZR) protein levels as determined in Figure 1A and either DOX IC<sub>50</sub> or DTX IC<sub>50</sub>, for the indicated cell lines.
