# Supplementary material for: Targeting the Ezrin Adaptor Protein Sensitizes Metastatic Breast Cancer Cells to Chemotherapy and Reduces Neoadjuvant Therapy–induced Metastasis
Source: PubMed Central journal article supplement (PMC10010290; doi:10.1158/2767-9764.crc-21-0117), 2022-06-17
Supplement: crc-21-0117-s07.pdf [file crc-21-0117-s07.pdf]

Day 15 post-engraftment

**A**

Biophotonics imaging

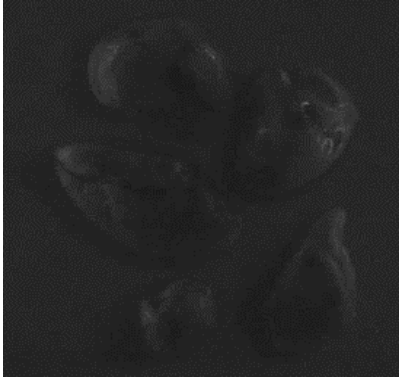

Confocal microscopy

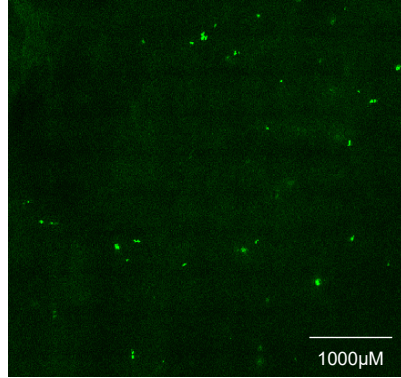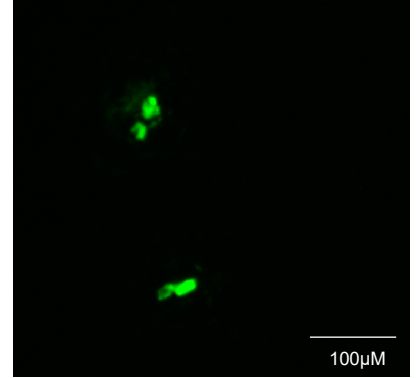

**B**

Day 20 Biophotonics

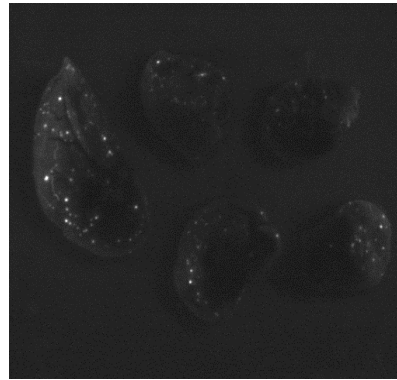

**C** Neoadjuvant Treatment  
Day 22 post-xenograft

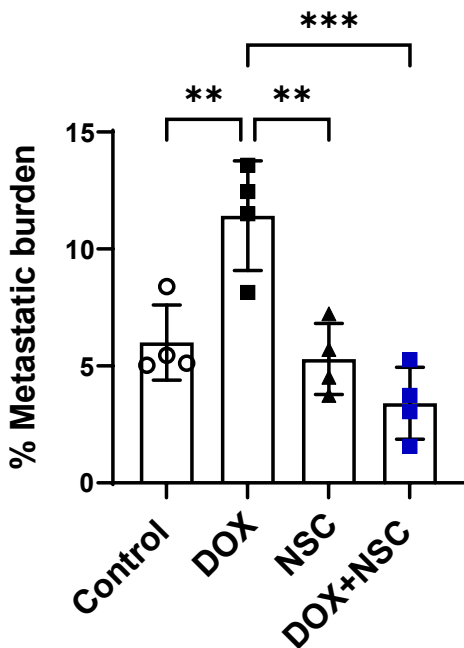

**D**

Neoadjuvant + Adjuvant  
Day 21 post-xenograft

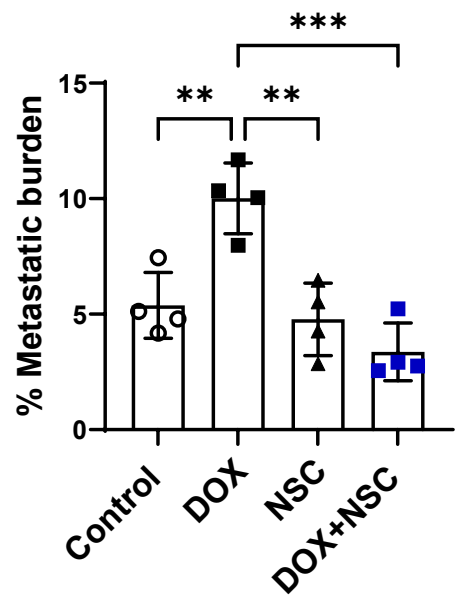

#### **Supplementary Figure 4. Assessment of microscopic metastasis and lung metastatic burden**

(**A, B**) Biophotonic images of lungs harvested from mice at day 15 (**A**, left panel) and day 20 (**B**) post-mammary fatpad injection were taken to determine the presence of metastasis. Metastases are not visible by this method until ~ day 20. Spinning Disk Confocal microscopy of lungs at day 15 post-engraftment was performed to confirm the presence of microscopic metastasis (Panel A, centre, right). (**C**) Metastatic burden at the time of tumor resection (~day 22) was assessed by biophotonic imaging and quantified as described in Materials and Methods. N=4 mice per group. (**D**) Assessment of metastatic burden day 21 post-engraftment in the neoadjuvant plus adjuvant treatment model by biophotonic imaging. N=4 mice per group. \*\*p<0.01; \*\*\*p<0.001 using one-way ANOVA with Tukey's post test.
