# Supplementary material for: Targeting the Ezrin Adaptor Protein Sensitizes Metastatic Breast Cancer Cells to Chemotherapy and Reduces Neoadjuvant Therapy–induced Metastasis
Source: PubMed Central journal article supplement (PMC10010290; doi:10.1158/2767-9764.crc-21-0117), 2022-06-17
Supplement: crc-21-0117-s09.pdf [file crc-21-0117-s09.pdf]

# Supplementary Figure 6

## MCF-7

2hrs                      24hrs

Media DMSO DOX DTX    Media DMSO DOX DTX

Ezrin

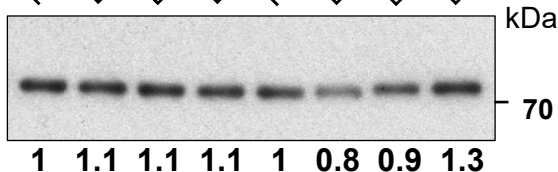

pEZR/  
pRDX

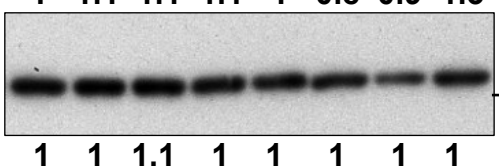

γ-tubulin

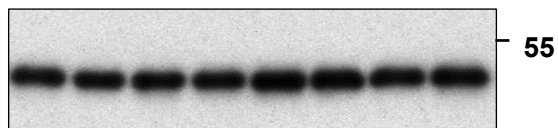

## T-47D

2hrs                      24hrs

Media DMSO DOX DTX    Media DMSO DOX DTX

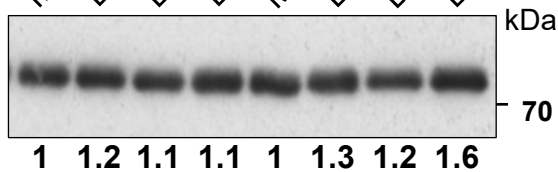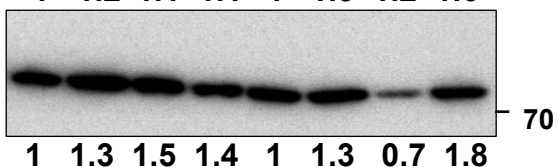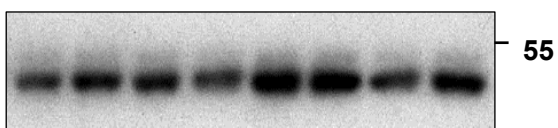

## ZR-75-1

2hrs                      24hrs

Media DMSO DOX DTX    Media DMSO DOX DTX

Ezrin

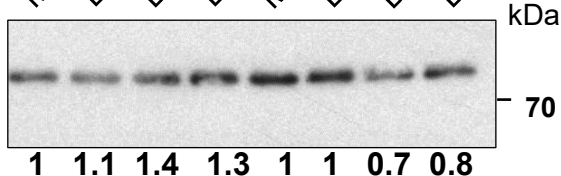

pEZR/  
pRDX

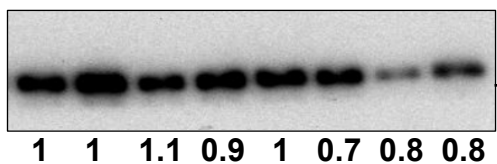

γ-tubulin

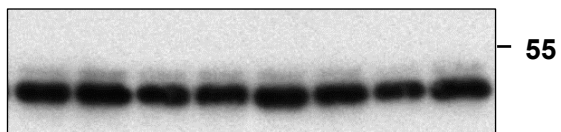

## MDA-MB-231

2hrs                      24hrs

Media DMSO DOX DTX    Media DMSO DOX DTX

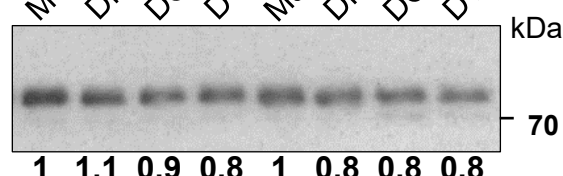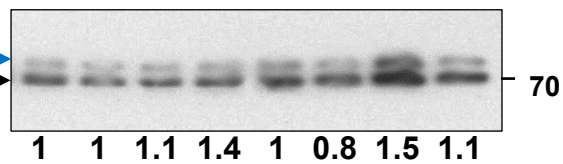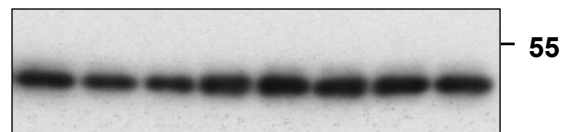

## **Supplementary Figure 6. Ezrin protein expression after DOX and DTX drug challenge**

Immunoblotting analysis of ezrin in MCF-7, T-47D, ZR-75-1 and MDA-MB-231 cells after short term exposure to DOX or DTX. Cells were treated at for 2h or 24h based on the IC<sub>50</sub> values of DOX/DTX for each cell line as determined in Supplementary Figure 1A.  $\gamma$ -tubulin is shown as a loading control. Densitometric analysis was performed and the relative ezrin levels for each treatment are shown. The values were first normalized to  $\gamma$ -tubulin and then made relative to the media only (media) control for each time point. Data are representative of 3 independent experiments. No statistically significant difference among the treatments was observed, based on one-way ANOVA with Dunnett's post test.
